# Supplementary material
Source: MDPI journal article supplement (https://www.mdpi.com/1424-8247/15/2/216)
Supplement: s1 [file s1]

## SUPPLEMENTARY DATA

### Design, Characterization, and Antimicrobial Evaluation of Copper Nanoparticles Utilizing Tamarixinin A Ellagitannin from Galls of *Tamarix aphylla*

Mohamed A. A. Orabi <sup>1,\*</sup>, Mounir M. Salem-Bekhit <sup>2,3</sup>, Ehab I. Taha <sup>4</sup>, El-Shaymaa Abdel-Sattar <sup>5</sup>, Omaish Salman Alqahtani <sup>1</sup>, Fakhria A. Al-Joufi <sup>6</sup>, Basel A. Abdel-Wahab <sup>7</sup>, Ali Mohamed Alshabi <sup>8</sup>, Hamad S. Alyami <sup>9,\*</sup>, Javed Ahmad <sup>9</sup> and Tsutomu Hatano <sup>10</sup>

- <sup>1</sup> Department of Pharmacognosy, College of Pharmacy, Najran University, Najran 1988, Saudi Arabia; osalqahtani@nu.edu.sa
  - <sup>2</sup> Kyyali Chair for Pharmaceutical Industry, Department of Pharmaceutics, College of Pharmacy, King Saud University, Riyadh 11451, Saudi Arabia; mounirmsalem@yahoo.com
  - <sup>3</sup> Microbiology and Immunology Department, Faculty of Pharmacy, Al-Azhar University, Cairo 11884, Egypt
  - <sup>4</sup> Department of Pharmaceutics, College of Pharmacy, King Saud University, P.O. Box 2457, Riyadh 11451, Saudi Arabia; eelbadawi@ksu.edu.sa
  - <sup>5</sup> Department of Microbiology and Immunology, Faculty of Pharmacy, South Valley University, 83523 Qena, Egypt; elshaymaa\_a\_m@svu.edu.eg
  - <sup>6</sup> Department of Pharmacology, College of Pharmacy, Jouf University, Al-Jouf 72341, Saudi Arabia; faaljoufi@ju.edu.sa
  - <sup>7</sup> Department of Pharmacology, College of Pharmacy, Najran University, Najran 1988, Saudi Arabia; babdelnaem@nu.edu.sa
  - <sup>8</sup> Department of Clinical Pharmacy, College of Pharmacy, Najran University, Najran 1988, Saudi Arabia; amalshabi@nu.edu.sa
  - <sup>9</sup> Department of Pharmaceutics, College of Pharmacy, Najran University, Najran 1988, Saudi Arabia; jaahmed@nu.edu.sa
  - <sup>10</sup> Graduate School of Medicine, Dentistry and Pharmaceutical Sciences, Okayama University, Tsushima, Okayama 700-8530, Japan; hsalmukalas@nu.edu.sa
- \* Correspondence: maorabi@nu.edu.sa (M.A.A.O.); hsalmukalas@nu.edu.sa (H.S.A.); Tel.: +966-557398835 (M.A.A.O.); +966-500095255 (H.S.A.)

## List of contents

| Content                                                                                                                                                             | Page |
|---------------------------------------------------------------------------------------------------------------------------------------------------------------------|------|
| <b>Figure S1.</b> $^1\text{H}$ NMR spectrum of tamarixinin A [ $600 \times 10^3$ KHz, (acetone- $d_6$ + $\text{D}_2\text{O}$ , 9:1), $27^\circ\text{C}$ ].          | S3   |
| <b>Figure S2.</b> Expanded $^1\text{H}$ NMR spectrum of tamarixinin A [ $600 \times 10^3$ KHz, (acetone- $d_6$ + $\text{D}_2\text{O}$ , 9:1), $27^\circ\text{C}$ ]. | S4   |
| <b>Figure S3.</b> HRESIMS of tamarixinin A.                                                                                                                         | S5   |

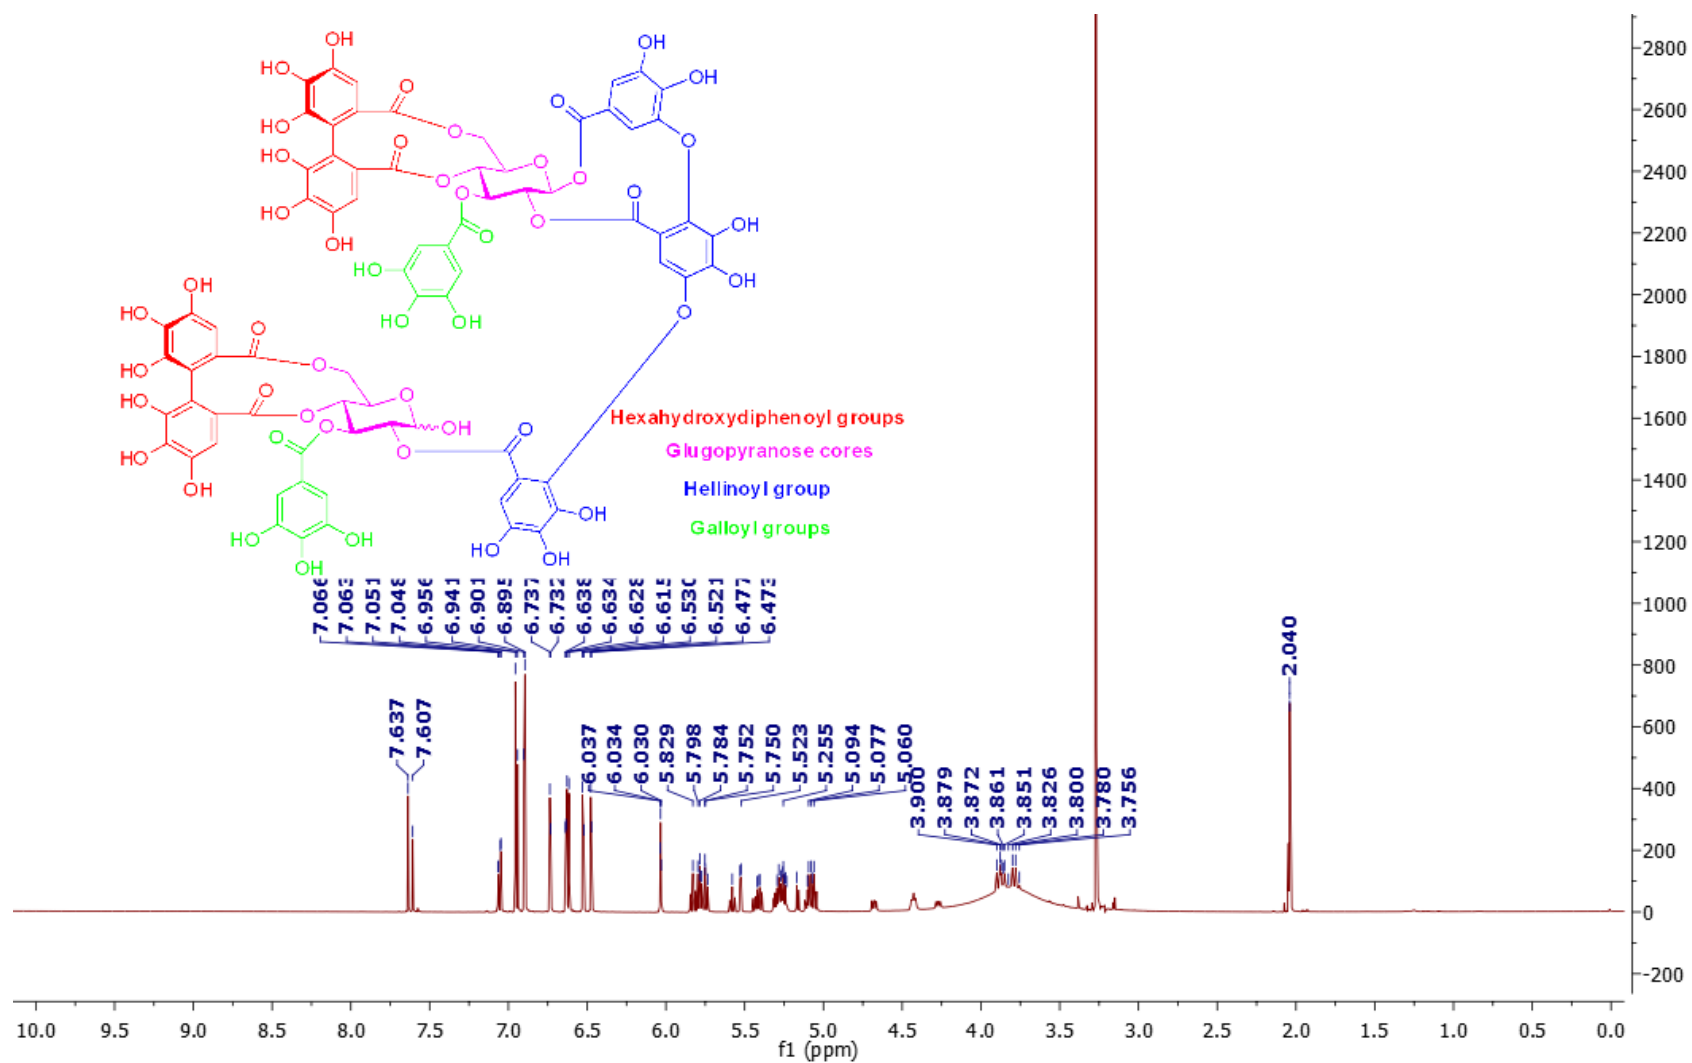

**Figure S1.**  $^1\text{H}$  NMR spectrum of tamarixinin A [ $600 \times 10^3$  KHz, (acetone- $d_6$  +  $\text{D}_2\text{O}$ , 9:1), 27 °C].

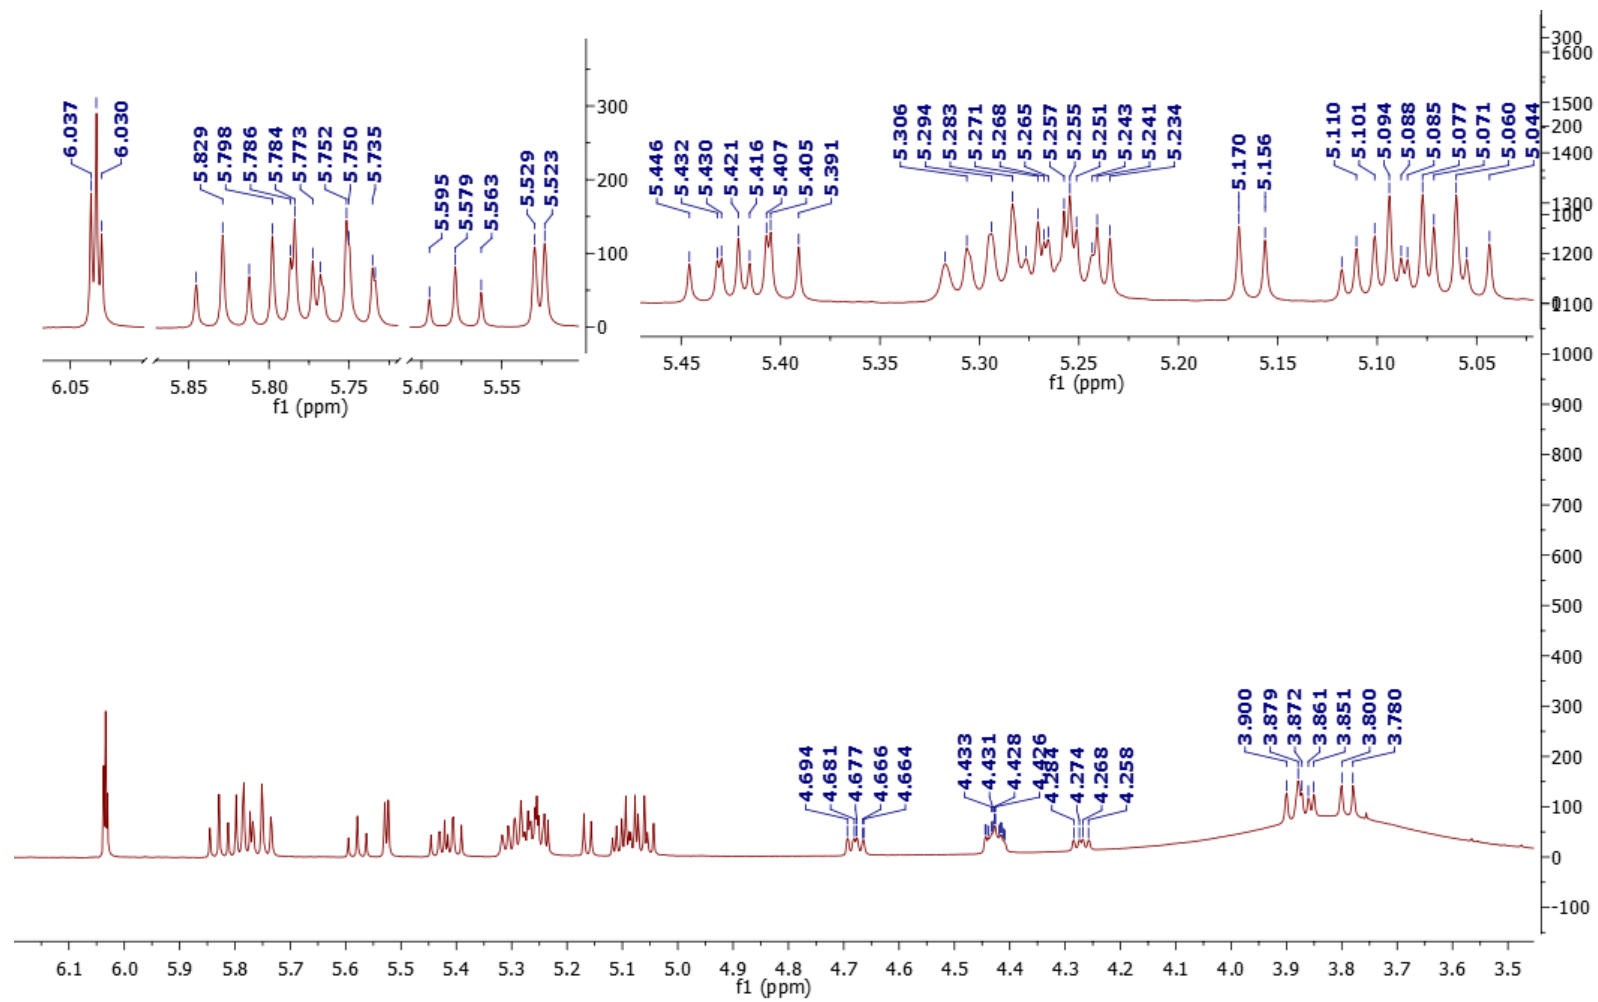

**Figure S2.** Expanded  $^1\text{H}$  NMR spectrum of tamarixinin A [ $600 \times 10^3$  KHz, (acetone- $d_6$  +  $\text{D}_2\text{O}$ , 9:1), 27 °C].

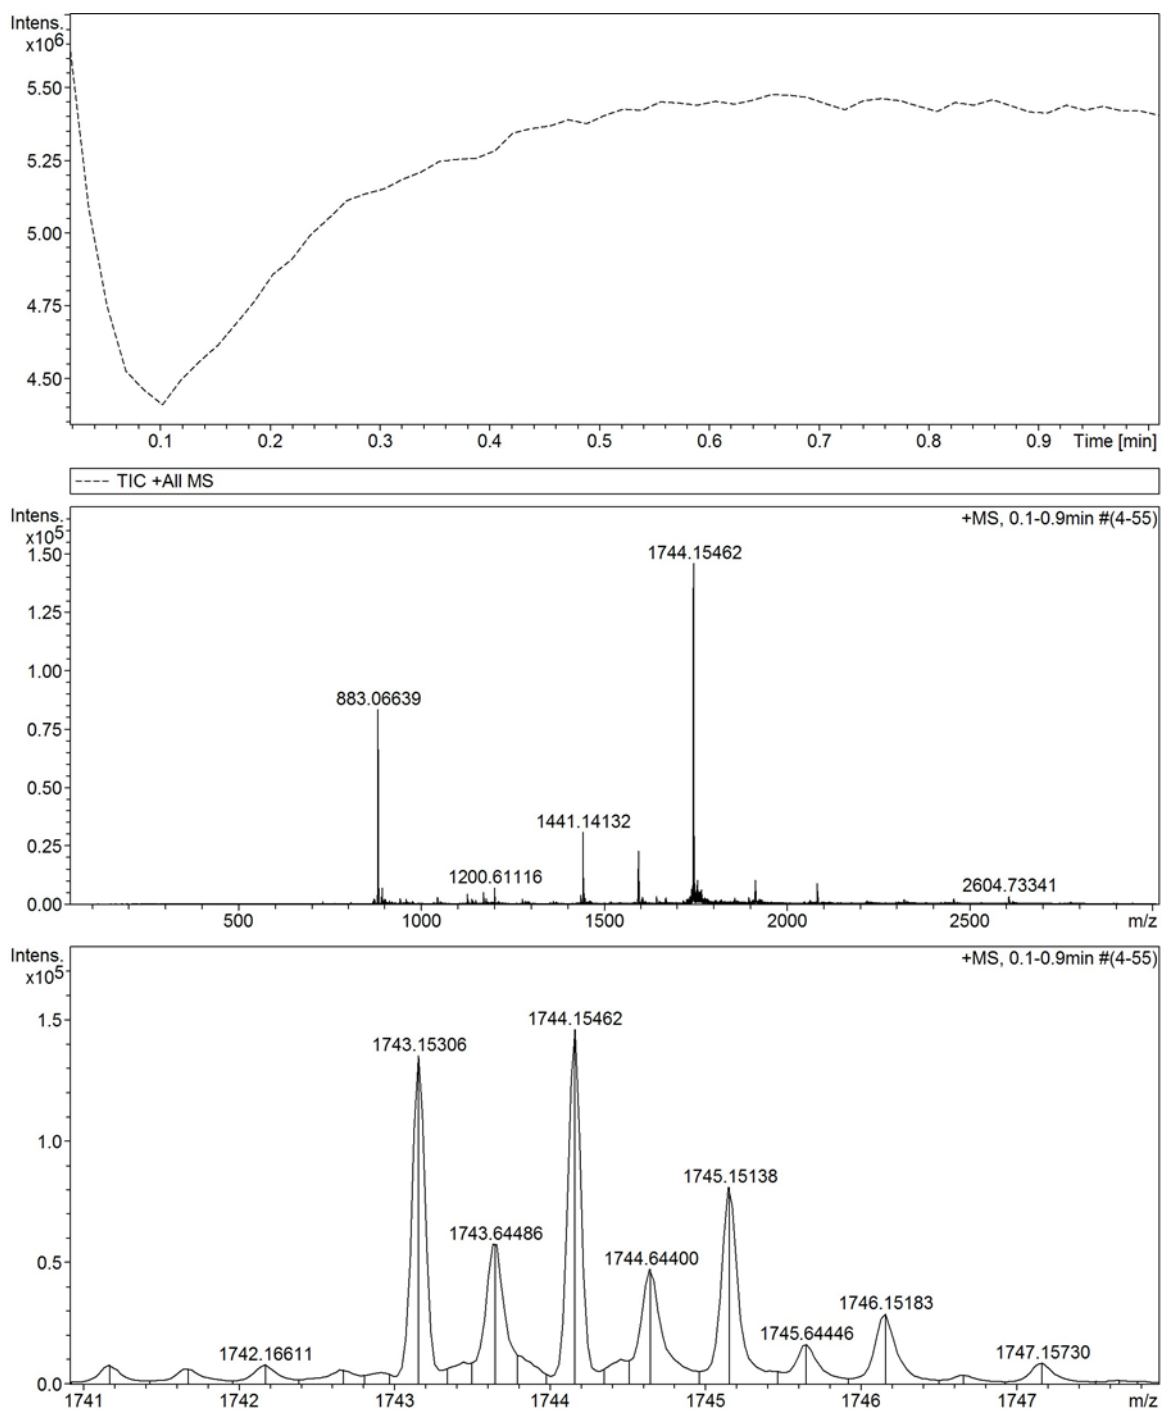

**Figure S3.** HRESIMS of tamarixinin A.
